# Supplementary material for: Temperature-dependent upconversion luminescence and dynamics of NaYF4:Yb3+/Er3+ nanocrystals: influence of particle size and crystalline phase
Source: Royal Society of Chemistry journal article supplement (doi:10.1039/c3dt53562b), 2014-01-01
Supplement: c3dt53562b.pdf [file c3dt53562b.pdf]

# **Temperature-Dependent Upconversion Luminescence and Dynamics of NaYF<sub>4</sub>:Yb<sup>3+</sup>/Er<sup>3+</sup> Nanocrystals: Influence of Particle Size and Crystalline Phase**

Wei Yu, Wen Xu, Hongwei Song\* and Shuang Zhang\*

## **Supporting Information**

The UCL decay time of the transitions at 416nm 544 nm and 656 nm of Er<sup>3+</sup> ions in 25 nm  $\alpha$ -NaYF<sub>4</sub> Figure S1 (a),(b) and (c); bulk  $\beta$ -NaYF<sub>4</sub> Figure S2 (a), (b) and (c) samples with different temperature. From the best fitting functions it can be seen that for the 25-nm and bulk samples, their luminescent dynamics are similar to those of the 45-nm samples in our work.

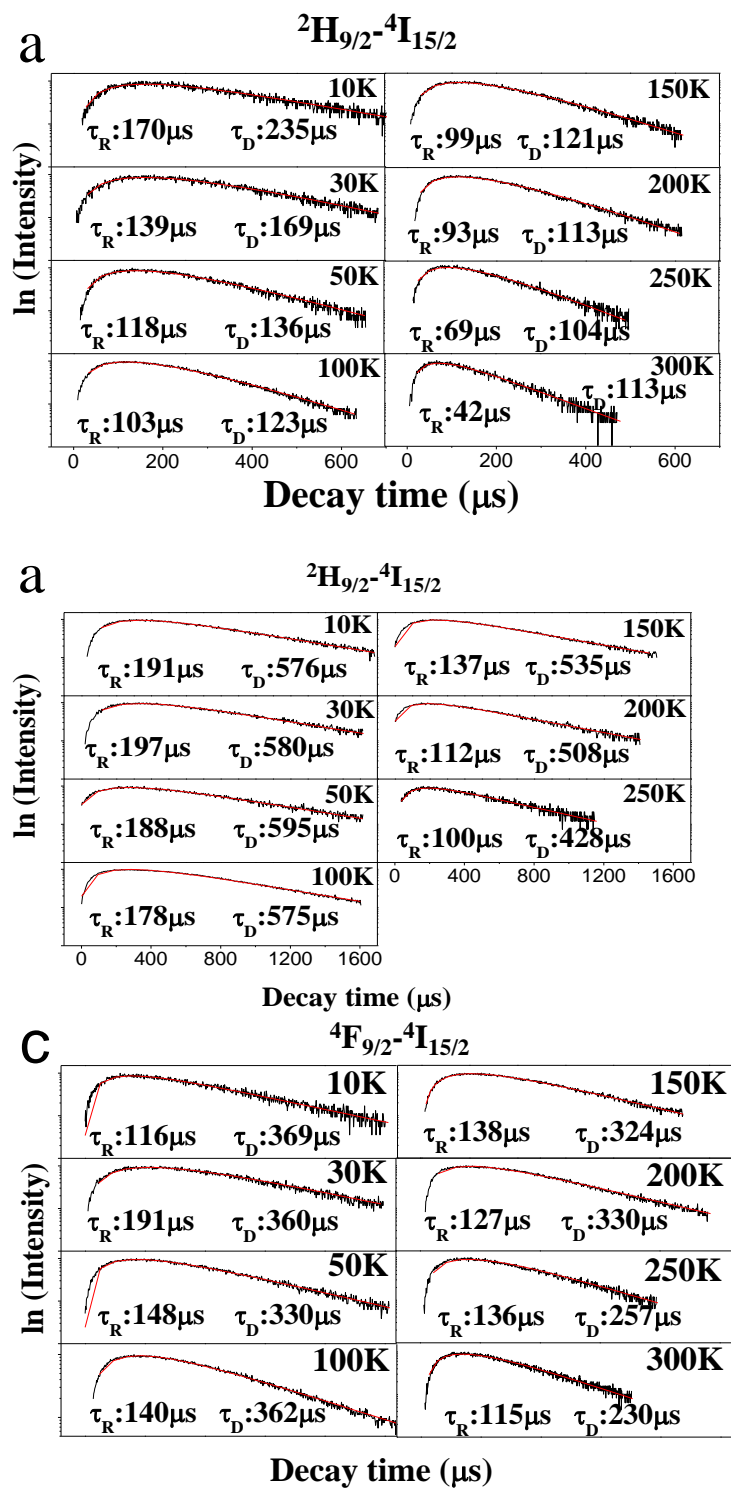

**Figure S1** The UCL decay time of the transitions at 416nm 544 nm and 656 nm of  $\text{Er}^{3+}$  ions in 25 nm  $\alpha\text{-NaYF}_4$

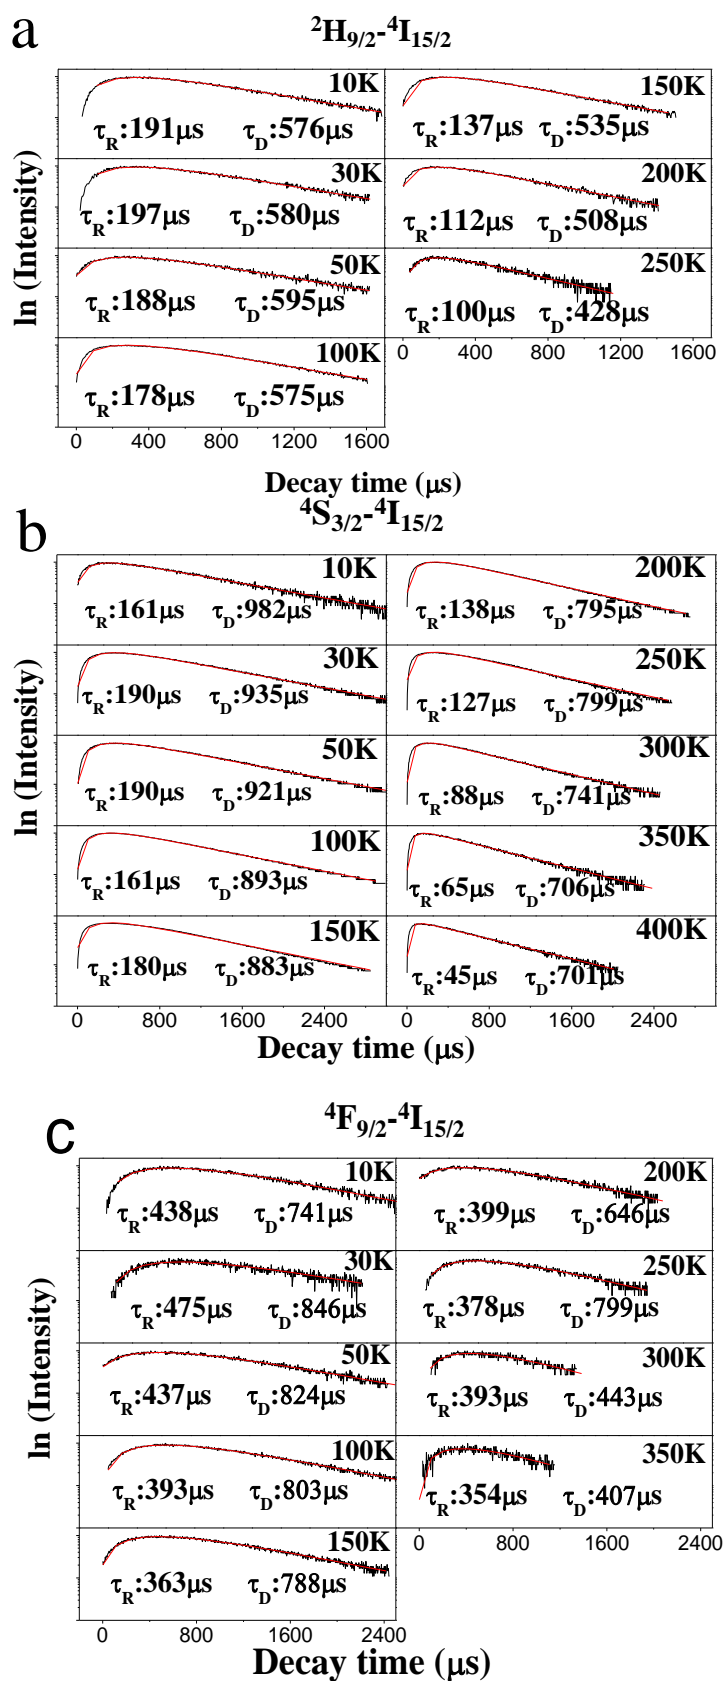

**Figure S2** The UCL decay time of the transitions at 416nm 544 nm and 656 nm of

$Er^{3+}$  ions in 25 nm  $\alpha$ -NaYF<sub>4</sub>
